# Supplementary material
Source: PubMed Central journal article supplement (PMC6194123)
Supplement: 41396_2018_161_MOESM1_ESM.pdf [file 41396_2018_161_MOESM1_ESM.pdf]

1 ***Ixodes scapularis* does not harbor a stable midgut microbiome**

2  
3 Benjamin D. Ross<sup>1,\*</sup>, Beth Hayes<sup>2</sup>, Matthew C. Radey<sup>1</sup>, Xia Lee<sup>3</sup>, Tanya Josek<sup>4</sup>, Jenna Bjork<sup>5</sup>,  
4 David Neitzel<sup>5</sup>, Susan Paskewitz<sup>3</sup>, Seemay Chou<sup>2,\*</sup>, Joseph D. Mougous<sup>1,6,\*</sup>

5  
6 <sup>1</sup>Department of Microbiology, School of Medicine, University of Washington,  
7 Seattle, WA 98195, USA

8  
9 <sup>2</sup>Department of Biochemistry and Biophysics, University of California San Francisco,  
10 San Francisco, CA, USA

11  
12 <sup>3</sup>Department of Entomology, University of Wisconsin, Madison,  
13 WI 53706, USA

14  
15 <sup>4</sup>Department of Entomology, University of Illinois Urbana-Champaign,  
16 Urbana, IL 61801, USA

17  
18 <sup>5</sup>Vectorborne Diseases Unit,  
19 Minnesota Department of Health,  
20 St. Paul, MN 55164, USA

21  
22 <sup>6</sup>Howard Hughes Medical Institute, School of Medicine, University of Washington,  
23 Seattle, WA 98195, USA

24  
25  
26 \*To whom correspondence should be addressed: [bdross@uw.edu](mailto:bdross@uw.edu), [seemay.chou@ucsf.edu](mailto:seemay.chou@ucsf.edu),  
27 [mougous@u.washington.edu](mailto:mougous@u.washington.edu)

28  
29  
30 This file includes:

31 Supplemental Figures 1-8

32 Supplemental Tables 1-2

33

34

35

36

37

1 **Supplementary Figures**

2

3

4

5

6

7

8

9

10

11

12

13

14

15

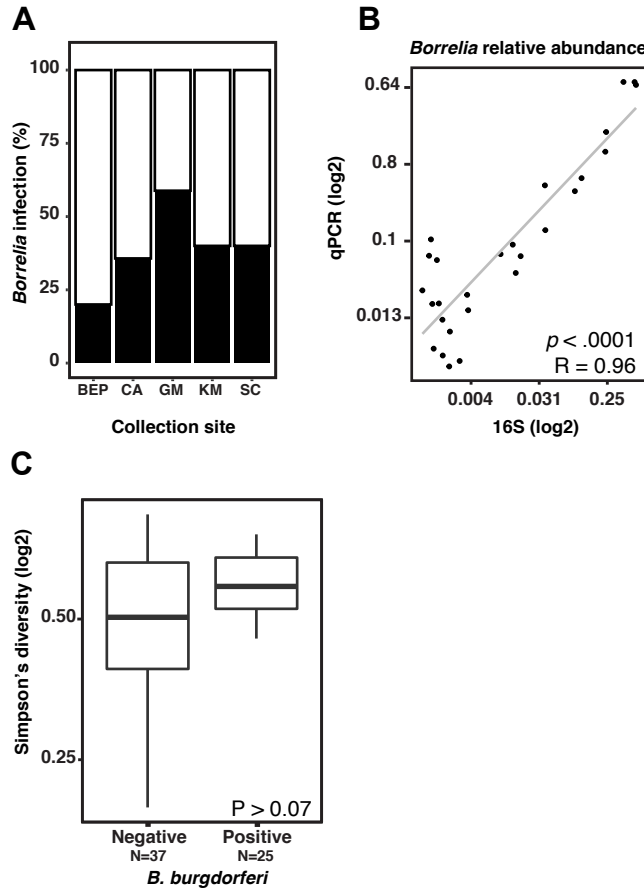

16 **Figure S1. Characterization of *Borrelia burgdorferi* infection in wild *I. scapularis*.**

17 **(A)** *Borrelia* infection frequency as determined by qPCR for *B. burgdorferi* *flaB* gene, plotted by

18 collection site. **(B)** The relative abundance of *B. burgdorferi* as measured by qPCR with *flaB*

19 primers calculated as a percent of total 16S rRNA gene counts exhibits a strong positive

20 correlation between the relative abundance of *Borrelia* by 16S rRNA gene sequencing (Pearson

21  $p < 0.0001$ ,  $r = 0.96$ ). **(C)** Alpha diversity as quantified by the Simpson's diversity metric,

22 plotted for *B. burgdorferi* infected and uninfected ticks. No significant difference is observed (t-

23 test,  $p > 0.07$ ).

1  
2  
3

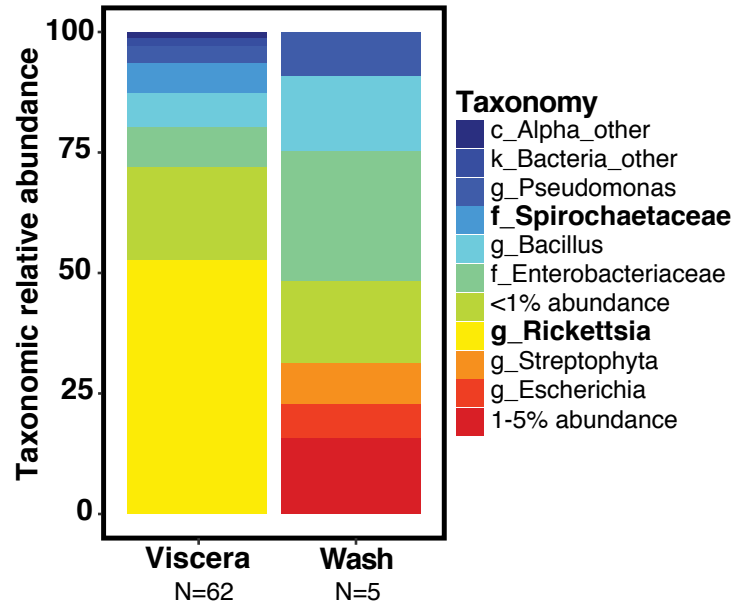

4  
5  
6  
7  
8  
9  
10  
11  
12

**Figure S2. Taxonomic characterization of the *I. scapularis* microbiota.**

Relative taxonomic abundance for bacteria detected by 16S rRNA gene sequencing averaged across all adult *I. scapularis* internal viscera samples and external washes. Taxa previously known to be associated with *I. scapularis* are bolded in legend.

1

2

3

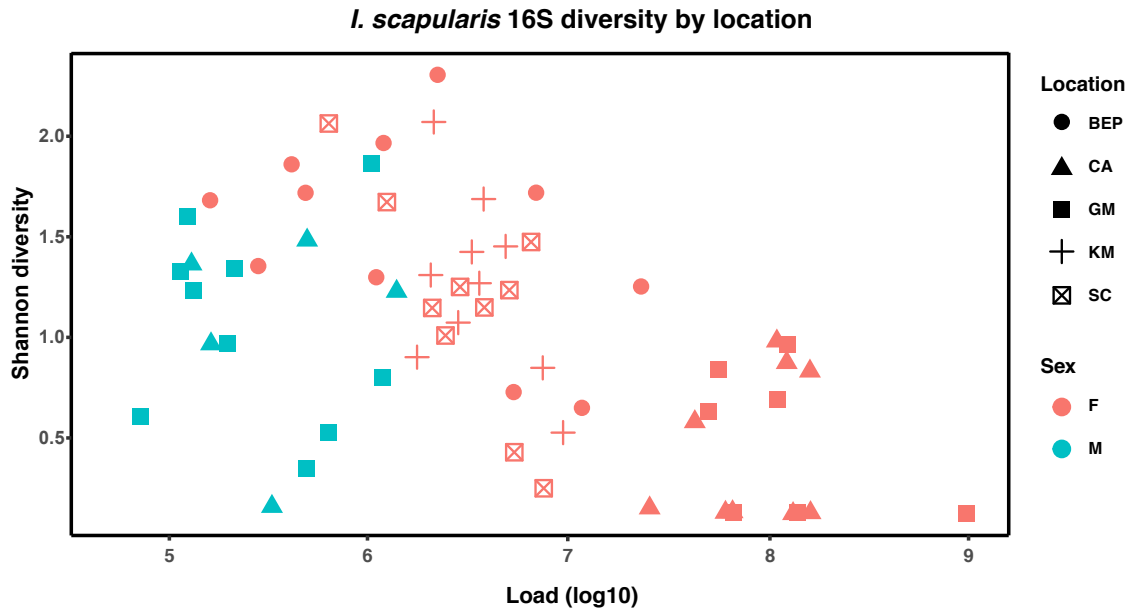

4

5 **Figure S3. Bacterial load and diversity in adult female *I. scapularis* ticks across sample**  
 6 **collection sites.**

7 Shannon diversity (y-axis) and bacterial load as measured by qPCR (x-axis) of adult female *I.*  
 8 *scapularis* ticks. Samples cluster by sex, but not by geographic collection site. Big Eau Pleine  
 9 (BEP), Carlos Avery (CA), Gordie Mikkelson (GM), Kettle Moraine (KM), Sandberg  
 10 Conservancy (SC).

11

12

1

2

3

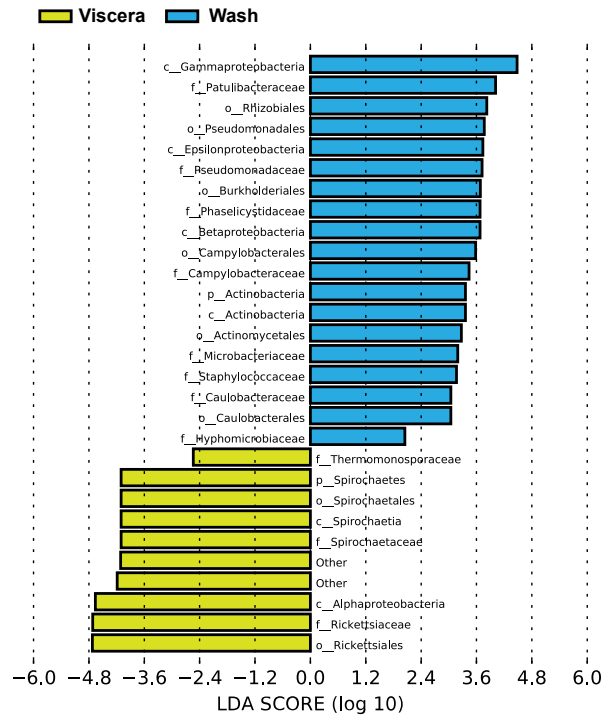

4

5 **Figure S4. LefSe plot of *I. scapularis* samples.**

6 Taxa enriched in either the viscera (yellow) or the wash samples (blue) as measured by the LDA  
7 score are indicated.

8

9

1  
2  
3

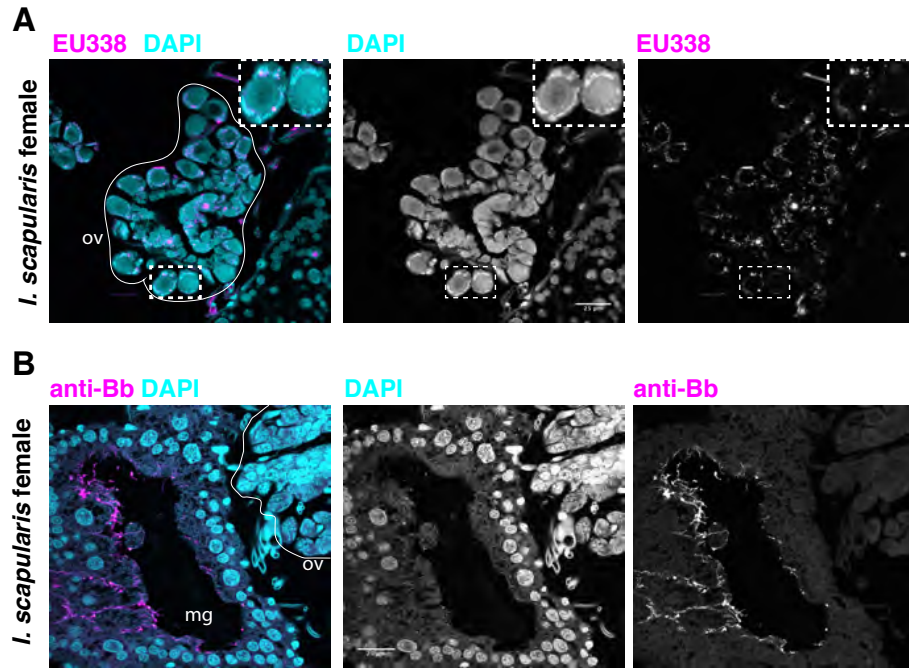

4

5 **Figure S5. Detection of internal bacteria within *I. scapularis* by confocal microscopy.**

6 **A)** DAPI (blue) and EU338-TSA-ISH (magenta) staining of the central section of the ovary of a  
7 female adult *I. scapularis* tick. The ovary is outlined in white and region of inset zoom is  
8 indicated by a dashed white rectangle. **(B)** Anti-*B. burgdorferi* (magenta) and DAPI (blue)  
9 staining of a midgut cross-section and ovary of an infected *I. scapularis* adult female tick. The  
10 midgut lumen is indicated by “mg”, and ovary is outlined in white. Scale bars are 25 microns.

11  
12  
13  
14  
15

1

2

3

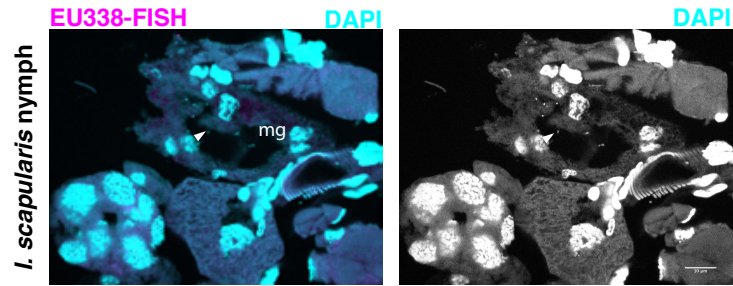

4

5 **Figure S6. Confocal microscopy of *I. scapularis* nymph.**

6 DAPI (blue) and EU338-TSA-ISH (magenta) staining of an *I. scapularis* nymph. Midgut is  
7 indicated by an arrowhead. Scale bar is 10 microns.

8

9

1

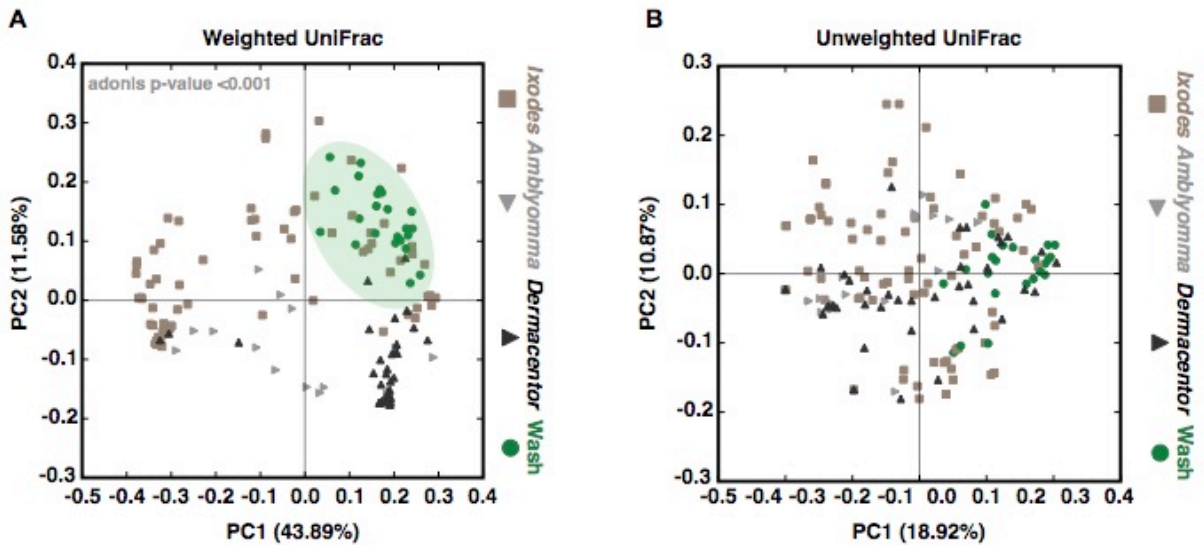

2

3 **Figure S7. Beta diversity analysis of adult hard tick samples.**

4 **A)** Beta diversity analysis using weighted UniFrac (which accounts for taxon relative abundance  
5 within samples) reveals clustering by external wash samples and by tick species. **B)** Beta  
6 diversity analysis using the unweighted UniFrac metric (in which the relative abundance of taxa  
7 within samples is not taken into account) shows a lack of species-specific clustering.

8

9



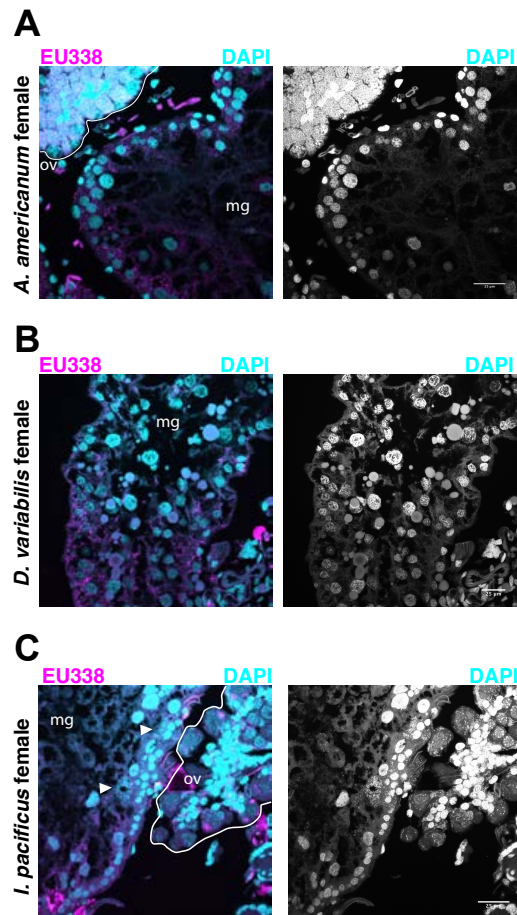

2

3 **Figure S8. Confocal microscopy of non-*I. scapularis* hard ticks.**

4 **(A)** *Amblyomma maculatum* adult female, **(B)** *Dermacentor variabilis* adult female, **(C)** and

5 *Ixodes pacificus* adult female. All ticks stained with DAPI (blue) and EU338-TSA-ISH

6 (magenta), with the midgut lumen indicated with “mg” and ovary with “ov”. Arrowheads

7 indicate bacterial micro-colonies within midgut. Ovaries are outlined in white in A and C. Scale

8 bars are 25 microns.

**Table S1.** 84 Spirochaetes, Deferribacteres, tick endosymbiont, and pathogen genomes analyzed in this study.

| <b>Genome</b>                               | <b>Strain</b>   | <b>Assembly</b> |
|---------------------------------------------|-----------------|-----------------|
| <i>Alkalispirochaeta alkalica</i>           | DSM 8900        | GCF_000373545.1 |
| <i>Anaplasma phagocytophilum</i>            | HZ2             | GCF_000439755.1 |
| <i>Anaplasma phagocytophilum</i>            | HZ              | GCF_000013125.1 |
| <i>Anaplasma phagocytophilum</i>            | JM              | GCF_000439775.1 |
| <i>Anaplasma phagocytophilum</i>            | Norway_variant2 | GCF_000689635.2 |
| <i>Borrelia afzelii</i>                     | HLJ01           | GCF_000304735.1 |
| <i>Borrelia afzelii</i>                     | K78             | GCF_000962775.1 |
| <i>Borrelia afzelii</i>                     | PKo             | GCF_000222835.1 |
| <i>Borrelia afzelii</i>                     | Tom3107         | GCF_000741005.1 |
| <i>Borrelia burgdorferi</i>                 | B31             | GCF_000008685.2 |
| <i>Borrelia burgdorferi</i>                 | CA-11.2A        | GCF_000172315.2 |
| <i>Borrelia duttonii</i>                    | Ly              | GCF_000019685.1 |
| <i>Borrelia garinii</i>                     | BgVir           | GCF_000239475.1 |
| <i>Borrelia garinii</i>                     | NMJW1           | GCF_000300045.1 |
| <i>Borrelia garinii</i>                     | SZ              | GCF_000691545.1 |
| <i>Borrelia hermsii</i>                     | CC1             | GCF_000956315.1 |
| <i>Borrelia hermsii</i>                     | HS1             | GCF_001660005.1 |
| <i>Borrelia miyamotoi</i>                   | CT14D4          | GCF_000807295.1 |
| <i>Borrelia miyamotoi</i>                   | LB-2001         | GCF_000445425.4 |
| <i>Borrelia persica</i>                     | No12            | GCF_000500045.1 |
| <i>Borrelia parkeri</i>                     | HR1             | GCF_000512145.1 |
| <i>Borrelia turicatae</i>                   | 91E135          | GCF_000012085.1 |
| <i>Borrelia recurrentis</i>                 | A1              | GCF_000019705.1 |
| <i>Brachyspira hyodysenteriae</i>           | ATCC_27164      | GCF_001676785.2 |
| <i>Brachyspira hyodysenteriae</i>           | WA1             | GCF_000022105.1 |
| <i>Brachyspira intermedia</i>               | PWS_A           | GCF_000223215.1 |
| <i>Brachyspira murdochii</i>                | DSM_12563       | GCF_000092845.1 |
| <i>Brachyspira pilosicoli</i>               | 95_1000         | GCF_000143725.1 |
| <i>Brachyspira pilosicoli</i>               | B2904           | GCF_000296575.1 |
| <i>Brachyspira pilosicoli</i>               | P43_6_78        | GCF_000325665.1 |
| <i>Caldithrix abyssi</i>                    | DSM_13497       | GCF_000241815.1 |
| <i>Coxiella-like endosymb. of Amblyomma</i> | C904            | GCF_000815025.1 |
| <i>Coxiella burnettii</i>                   | RSA 493         | GCF_000007765.1 |
| <i>Ehrlichia chaffeensis</i>                | Arkansas        | GCF_000013145.1 |
| <i>Ehrlichia chaffeensis</i>                | Heartland       | GCF_000632815.1 |
| <i>Ehrlichia chaffeensis</i>                | Jax             | GCF_000632865.1 |
| <i>Ehrlichia chaffeensis</i>                | Liberty         | GCF_000632885.1 |
| <i>Ehrlichia chaffeensis</i>                | Osceola         | GCF_000632905.1 |

|                                               |                                         |                 |
|-----------------------------------------------|-----------------------------------------|-----------------|
| <i>Ehrlichia chaffeensis</i>                  | Saint Vincent                           | GCF_000632925.1 |
| <i>Ehrlichia chaffeensis</i>                  | Wakulla                                 | GCF_000632945.1 |
| <i>Ehrlichia chaffeensis</i>                  | West Paces                              | GCF_000632965.1 |
| <i>Geovibrio sp. L21</i>                      | Ace-BES                                 | GCF_000421105.1 |
| <i>Leptospira alstonii</i>                    | GWTS #1                                 | GCF_001729245.1 |
| <i>Leptospira biflexa</i>                     | serovar Patoc 1 (Ames)                  | GCF_000017605.1 |
| <i>Leptospira biflexa</i>                     | serovar Patoc 1 (Paris)                 | GCF_000017685.1 |
| <i>Leptospira borgpetersenii</i>              | serovar Ballum                          | GCF_001444465.1 |
| <i>Leptospira borgpetersenii</i>              | serovar Hardjo-bovis str. JB197         | GCF_000013965.1 |
| <i>Leptospira borgpetersenii</i>              | serovar Hardjo-bovis str. L550          | GCF_000013945.1 |
| <i>Leptospira interrogans</i>                 | serovar Bratislava                      | GCF_001010765.1 |
| <i>Leptospira interrogans</i>                 | serovar Copenhageni str. Fiocruz_L1-130 | GCF_000007685.1 |
| <i>Leptospira interrogans</i>                 | serovar Hardjo str. Norma               | GCF_001293065.1 |
| <i>Leptospira interrogans</i>                 | serovar Lai str. 56601                  | GCF_000092565.1 |
| <i>Leptospira interrogans</i>                 | serovar Lai str. IPAV                   | GCF_000231175.1 |
| <i>Leptospira interrogans</i>                 | serovar Linhai str. 56609               | GCF_000941035.1 |
| <i>Leptospira interrogans</i>                 | serovar Manilae                         | GCF_001047655.1 |
| <i>Leptospira interrogans</i>                 | Grippotyphosa UI 12764                  | GCF_000244315.2 |
| <i>Leptospira kirschneri</i>                  | H1                                      | GCF_000243915.1 |
| <i>Leptospira santarosai</i>                  | serovar Arenal str. MAVJ 401            | GCF_000243835.1 |
| <i>Leptospira santarosai</i>                  | serovar Shermani str. LT 821            | GCF_000313175.2 |
| <i>Rickettsia endosymb. of I. scapularis</i>  |                                         | GCF_000160735.1 |
| <i>Rickettsia peacockii</i>                   | Rustic                                  | GCF_000021525.1 |
| <i>Rickettsia belli</i>                       | RML369-C                                | GCF_000012385.1 |
| <i>Salinispira pacificus</i>                  | L21-RPul-D2                             | GCF_000507245.1 |
| <i>Sediminispirochaeta bajacaliforniensis</i> | DSM 16054                               | GCF_000378205.1 |
| <i>Sediminispirochaeta smaragdinae</i>        | DSM 11293                               | GCF_000143985.1 |
| <i>Sphaerochaeta globosa</i>                  | Buddy                                   | GCF_000190435.1 |
| <i>Sphaerochaeta coccoides</i>                | DSM 17374                               | GCF_000208385.1 |
| <i>Sphaerochaeta pleomorpha</i>               | Grapes                                  | GCF_000236685.1 |
| <i>Spirochaeta lutea</i>                      | JC230                                   | GCF_000758165.1 |
| <i>Spirochaeta africana</i>                   | DSM_8902                                | GCF_000242595.2 |
| <i>Spirochaeta aurantia</i>                   | M1                                      | IMG: 2579779150 |
| <i>Spirochaeta thermophila</i>                | DSM_6192                                | GCF_000147075.1 |
| <i>Spirochaeta thermophila</i>                | DSM_6578                                | GCF_000184345.1 |
| <i>Treponema brennaboreense</i>               | DSM_12168                               | GCF_000212415.1 |
| <i>Treponema caldarium</i>                    | DSM_7334                                | GCF_000219725.1 |
| <i>Treponema denticola</i>                    | ATCC 35405                              | GCF_000008185.1 |
| <i>Treponema pallidum subsp. pallidum</i>     | Nichols                                 | GCF_000008605.1 |
| <i>Treponema pallidum subsp. pallidum</i>     | Sea 81-4                                | GCF_000604125.1 |
| <i>Treponema pedis</i>                        | T A4                                    | GCF_000447675.1 |
| <i>Treponema phagedenis</i>                   | 4A                                      | GCF_000513775.1 |

|                                 |           |                 |
|---------------------------------|-----------|-----------------|
| <i>Treponema primitia</i>       | ZAS-2     | GCF_000214375.1 |
| <i>Treponema saccharophilum</i> | DSM 2985  | GCF_000255555.1 |
| <i>Treponema succinifaciens</i> | DSM 2489  | GCF_000195275.1 |
| <i>Turneriella parva</i>        | DSM 21527 | GCF_000266885.1 |

**Table S2.** Wild-collected hard ticks analyzed in this study.

| <b>Genus</b>       | <b>Species</b>    | <b>Life Stage</b> | <b>Sex</b> | <b>Collected</b> | <b>Sequenced</b> | <b>Analyzed by Microscopy</b> |
|--------------------|-------------------|-------------------|------------|------------------|------------------|-------------------------------|
| <i>Amblyomma</i>   | <i>maculatum</i>  | Adult             | Female     | 20               | 10               | 10                            |
| <i>Amblyomma</i>   | <i>maculatum</i>  | Adult             | Male       | 20               | 10               | 10                            |
| <i>Amblyomma</i>   | <i>maculatum</i>  | Nymph             | N/A        | 17               | N/A              | 10                            |
| <i>Dermacentor</i> | <i>andersoni</i>  | Adult             | Female     | 10               | 10               | N/A                           |
| <i>Dermacentor</i> | <i>andersoni</i>  | Adult             | Male       | 10               | 10               | N/A                           |
| <i>Dermacentor</i> | <i>variabilis</i> | Adult             | Female     | 22               | 10               | 10                            |
| <i>Dermacentor</i> | <i>variabilis</i> | Adult             | Male       | 19               | 10               | 9                             |
| <i>Dermacentor</i> | <i>variabilis</i> | Nymph             | N/A        | 14               | N/A              | N/A                           |
| <i>Ixodes</i>      | <i>pacificus</i>  | Adult             | Female     | 37               | 10               | 10                            |
| <i>Ixodes</i>      | <i>pacificus</i>  | Adult             | Male       | 25               | 10               | 10                            |
| <i>Ixodes</i>      | <i>scapularis</i> | Adult             | Female     | 14               | 9                | 2                             |
| <i>Ixodes</i>      | <i>scapularis</i> | Adult             | Male       | 16               | 5                | 2                             |
| <i>Ixodes</i>      | <i>scapularis</i> | Nymph             | N/A        | 1                | N/A              | N/A                           |
| <i>Ixodes</i>      | <i>scapularis</i> | Adult             | Female     | 13               | 7                | 2                             |
| <i>Ixodes</i>      | <i>scapularis</i> | Adult             | Male       | 22               | 10               | 2                             |
| <i>Ixodes</i>      | <i>scapularis</i> | Nymph             | N/A        | 15               | N/A              | 10                            |
| <i>Ixodes</i>      | <i>scapularis</i> | Adult             | Female     | 20               | 10               | 10                            |
| <i>Ixodes</i>      | <i>scapularis</i> | Adult             | Female     | 20               | 10               | 10                            |
| <i>Ixodes</i>      | <i>scapularis</i> | Adult             | Female     | 20               | 10               | 10                            |
| <i>Ixodes</i>      | <i>scapularis</i> | Adult             | Female     | 5                | N/A              | N/A                           |
| <i>Ixodes</i>      | <i>scapularis</i> | Adult             | Male       | 9                | N/A              | 3                             |

**Table S2.** Wild-collected hard ticks analyzed in this study.

| <b>Genus</b>       | <b>Species</b>    | <b>Site of Collection</b>                                    | <b>Latitude/Longitude</b> |
|--------------------|-------------------|--------------------------------------------------------------|---------------------------|
| <i>Amblyomma</i>   | <i>maculatum</i>  | USA: McPherson Preserve, Stillwater, OK                      | 36.13 N 97.20 W           |
| <i>Amblyomma</i>   | <i>maculatum</i>  | USA: McPherson Preserve, Stillwater, OK                      | 36.13 N 97.20 W           |
| <i>Amblyomma</i>   | <i>maculatum</i>  | USA: McPherson Preserve, Stillwater, OK                      | 36.13 N 97.20 W           |
| <i>Dermacentor</i> | <i>andersoni</i>  | USA: Klickitat River Canyon, WA                              | 45.78 N 121.20 W          |
| <i>Dermacentor</i> | <i>andersoni</i>  | USA: Klickitat River Canyon, WA                              | 45.78 N 121.20 W          |
| <i>Dermacentor</i> | <i>variabilis</i> | USA: Carlos Avery WMA, Columbus, MN                          | 45.29 N 93.13 W           |
| <i>Dermacentor</i> | <i>variabilis</i> | USA: Carlos Avery WMA, Columbus, MN                          | 45.29 N 93.13 W           |
| <i>Dermacentor</i> | <i>variabilis</i> | USA: Carlos Avery WMA, Columbus, MN                          | 45.29 N 93.13 W           |
| <i>Ixodes</i>      | <i>pacificus</i>  | USA: Klickitat River Canyon, WA                              | 45.78 N 121.20 W          |
| <i>Ixodes</i>      | <i>pacificus</i>  | USA: Klickitat River Canyon, WA                              | 45.78 N 121.20 W          |
| <i>Ixodes</i>      | <i>scapularis</i> | USA: Carlos Avery WMA, Columbus, MN                          | 45.29 N 93.13 W           |
| <i>Ixodes</i>      | <i>scapularis</i> | USA: Carlos Avery WMA, Columbus, MN                          | 45.29 N 93.13 W           |
| <i>Ixodes</i>      | <i>scapularis</i> | USA: Carlos Avery WMA, Columbus, MN                          | 45.29 N 93.13 W           |
| <i>Ixodes</i>      | <i>scapularis</i> | USA: Gordie Mikkelson WMA, East Bethel, MN                   | 45.37 N 93.13 W           |
| <i>Ixodes</i>      | <i>scapularis</i> | USA: Gordie Mikkelson WMA, East Bethel, MN                   | 45.37 N 93.13 W           |
| <i>Ixodes</i>      | <i>scapularis</i> | USA: Gordie Mikkelson WMA, East Bethel, MN                   | 45.37 N 93.13 W           |
| <i>Ixodes</i>      | <i>scapularis</i> | USA: Sandburg Woods Conservancy, Madison, WI                 | 43.13 N 89.31 W           |
| <i>Ixodes</i>      | <i>scapularis</i> | USA: Kettle Moraine State Forest Southern Unit, Kewaskum, WI | 43.49 N 88.18 W           |
| <i>Ixodes</i>      | <i>scapularis</i> | USA: Big Eau Pleine County Park, Mosinee, WI                 | 44.76 N 89.87 W           |
| <i>Ixodes</i>      | <i>scapularis</i> | USA: Wolf Creek State Park, Windsor, IL                      | 39.48 N 88.69 W           |
| <i>Ixodes</i>      | <i>scapularis</i> | USA: Wolf Creek State Park, Windsor, IL                      | 39.48 N 88.69 W           |
